# Supplementary material for: Cryptococcus neoformans adapts to the host environment through TOR-mediated remodeling of phospholipid asymmetry
Source: Nat Commun. 2023 Oct 18;14:6587. doi: 10.1038/s41467-023-42318-y (PMC10584969; doi:10.1038/s41467-023-42318-y)
Supplement: Supplementary file 5 — Supplementary Data 2 [file 41467_2023_42318_MOESM5_ESM.xlsx]

## Sheet: Transcription Factor Competitio
Plate	Well	CNAG_XXXXX	Gene Name	Ambient	5% CO2	Ratio CO2/Amb	CHI Test
3	A4	CNAG_01626	ADA2	11.816	15.886	1.34445	0.207362
3	H3	CNAG_01626	ADA2	11.547	12.879	1.11535	0.676835
2	A5	CNAG_04268	APN1	47.694	43.89	0.920242	0.446293
2	H4	CNAG_04268	APN1	45.418	45.192	0.995024	0.963796
1	A6	CNAG_04398	ARO80	41.245	37.991	0.921106	0.508604
1	B6	CNAG_04398	ARO80	46.13	44.267	0.959614	0.708612
1	G4	CNAG_04345	ARO8001	37.092	36.405	0.981478	0.886905
1	H4	CNAG_04345	ARO8001	46.65	48.448	1.03854	0.718541
4	E4	CNAG_03849	ASG1	36.049	41.512	1.15154	0.255209
4	F4	CNAG_03849	ASG1	43.162	37.132	0.860294	0.223437
3	E8	CNAG_03018	ASG101	43.759	44.019	1.00594	0.958202
3	F8	CNAG_03018	ASG101	38.351	40.575	1.05799	0.647393
1	A5	CNAG_04090	ATF1	39.957	43.036	1.07706	0.529604
1	B5	CNAG_04090	ATF1	45.141	47.256	1.04685	0.670828
2	G7	CNAG_02435	BWC2	34.708	29.464	0.848911	0.270642
2	H7	CNAG_02435	BWC2	34.035	24.063	0.707007	0.0353291
1	E6	CNAG_06134	BZP1 (HXL1)	22.619	24.368	1.07732	0.675905
1	F6	CNAG_06134	BZP1 (HXL1)	24.055	26.566	1.10439	0.55688
3	A9	CNAG_04263	BZP2	1.589	0.941	0.592196	0.604324
3	B9	CNAG_04263	BZP2	1.42	1.079	0.759859	0.773183
1	E9	CNAG_00559	BZP3	28.339	30.225	1.06655	0.675573
1	F9	CNAG_00559	BZP3	47.644	47.795	1.00317	0.975881
2	A9	CNAG_03346	BZP4	47.032	47.085	1.00113	0.991528
2	B9	CNAG_03346	BZP4	43.501	44.688	1.02729	0.810771
2	F5	CNAG_07940	BZP5	32.92	36.178	1.09897	0.488118
2	G5	CNAG_07940	BZP5	25.456	22.034	0.865572	0.432126
1	G5	CNAG_03279	CCD4	36.253	37.78	1.04212	0.750757
1	H5	CNAG_03279	CCD4	47.948	57.546	1.20018	0.0547042
1	C8	CNAG_06276	CEP3	48.363	50.516	1.04452	0.666591
1	D8	CNAG_06276	CEP3	32.484	31.992	0.984854	0.91633
2	A4	CNAG_04353	CLR1	34.69	33.432	0.963736	0.791553
2	B4	CNAG_03132	CLR1	24.962	26.682	1.0689	0.691059
2	C4	CNAG_03132	CLR1	31.305	30.939	0.988309	0.937093
2	H3	CNAG_04353	CLR1	38.117	39.587	1.03857	0.76214
2	E7	CNAG_00871	CLR3	23.079	27.497	1.19143	0.294379
2	F7	CNAG_00871	CLR3	31.652	33.642	1.06287	0.668762
4	E2	CNAG_04908	CLR4	27.183	32.876	1.20943	0.200684
4	F2	CNAG_04908	CLR4	20.444	19.668	0.962043	0.847416
1	A10	CNAG_07797	CRL6	38.602	37.867	0.98096	0.879995
1	B10	CNAG_07797	CRL6	26.093	33.417	1.28069	0.0953558
3	A8	CNAG_07724	CUF1	4.14	3.678	0.888406	0.816606
3	B8	CNAG_07724	CUF1	3.085	2.385	0.773096	0.685601
2	B6	CNAG_04583	DDT1	44.63	46.698	1.04634	0.677405
3	E7	CNAG_04583	DDT1	55.743	48.049	0.861974	0.121369
1	G1	CNAG_03710	ECM22	27.233	30.272	1.11159	0.494811
1	H1	CNAG_03710	ECM22	33.819	43.304	1.28046	0.0449749
1	E5	CNAG_04588	ERT1	28.353	30.21	1.0655	0.680328
1	F5	CNAG_04588	ERT1	29.846	29.73	0.996113	0.979775
1	F7	CNAG_07506	FAP1	36.427	34.108	0.936338	0.62988
1	H7	CNAG_07506	FAP1	35.808	38.889	1.08604	0.520464
4	D4	CNAG_01069	FCZ11	42.888	41	0.955978	0.702848
4	F3	CNAG_03132	FCZ5	30.482	26.601	0.872679	0.399179
2	G8	CNAG_05861	FKH101	38.792	41.444	1.06836	0.58627
2	H8	CNAG_05861	FKH101	39.384	43.233	1.09773	0.430837
2	B2	CNAG_02566	FKH2	22.487	20.876	0.928359	0.699592
2	C2	CNAG_02566	FKH2	26.254	24.08	0.917194	0.621253
1	A3	CNAG_04878	FZC1	37.143	41.807	1.12557	0.334416
3	H11	CNAG_04836	FZC10	42.263	47.88	1.13291	0.255498
4	B5	CNAG_04836	FZC10	44.776	42.854	0.957075	0.699115
1	A8	CNAG_01069	FZC11	46.791	47.542	1.01605	0.880362
1	B8	CNAG_01069	FZC11	41.317	42.471	1.02793	0.814705
1	C1	CNAG_00670	FZC12	30.835	36.164	1.17282	0.248528
1	D1	CNAG_00670	FZC12	43.412	43.77	1.00825	0.942419
3	F5	CNAG_02066	FZC13	48.258	48.994	1.01525	0.882904
3	G5	CNAG_02066	FZC13	40.074	45.839	1.14386	0.239429
2	C8	CNAG_03914	FZC14	24.674	26.028	1.05488	0.753468
2	D8	CNAG_03914	FZC14	40.293	40.611	1.00789	0.948307
1	E4	CNAG_06188	FZC15	34.501	34.136	0.989421	0.938797
1	F4	CNAG_06188	FZC15	39.429	35.854	0.909331	0.464452
3	A3	CNAG_04916	FZC16	32.947	31.967	0.970255	0.834837
3	H2	CNAG_04916	FZC16	49.746	43.215	0.868713	0.191479
3	D1	CNAG_02322	FZC17	46.965	51.203	1.09024	0.395789
3	E1	CNAG_02322	FZC17	47.067	51.7	1.09843	0.353305
3	F2	CNAG_04012	FZC18	39.042	39.128	1.0022	0.985935
3	G2	CNAG_04012	FZC18	28.344	33.585	1.18491	0.244854
2	G10	CNAG_02364	FZC19	34.17	38.91	1.13872	0.317596
2	H10	CNAG_02364	FZC19	46.608	45.217	0.970155	0.780366
1	A9	CNAG_05255	FZC2	34.781	40.318	1.1592	0.245007
1	B9	CNAG_05255	FZC2	36.988	32.009	0.865389	0.302383
4	D1	CNAG_03086	FZC20	47.1	53.014	1.12556	0.236099
4	E1	CNAG_03086	FZC20	44.061	45.546	1.0337	0.76485
1	A12	CNAG_05019	FZC21	43.819	51.881	1.18398	0.104192
1	B12	CNAG_05019	FZC21	62.79	72.718	1.15811	0.039982
2	A7	CNAG_07011	FZC22	34.777	34.337	0.987348	0.926391
2	B7	CNAG_07011	FZC22	35.985	36.692	1.01965	0.882891
4	B4	CNAG_07011	FZC22	30.272	32.922	1.08754	0.564078
4	B1	CNAG_02723	FZC23	53.925	45.874	0.8507	0.106271
4	C1	CNAG_02723	FZC23	53.758	53.591	0.996893	0.97328
1	A7	CNAG_03183	FZC24	34.805	32.938	0.946358	0.695105
1	B7	CNAG_03183	FZC24	28.213	26.835	0.951157	0.759454
1	D3	CNAG_06483	FZC25	31.234	33.807	1.08238	0.578767
2	D7	CNAG_06483	FZC25	41.36	43.004	1.03975	0.738514
3	A12	CNAG_04774	FZC26	49.848	66.069	1.32541	0.00117775
3	B12	CNAG_04774	FZC26	38.759	38.235	0.986481	0.91435
1	C4	CNAG_04594	FZC27	46.468	44.094	0.948911	0.634082
1	D4	CNAG_04594	FZC27	41.716	39.37	0.943763	0.634234
3	F3	CNAG_00505	FZC28	45.24	46.115	1.01934	0.860452
3	G3	CNAG_00505	FZC28	39.992	42.752	1.06901	0.573162
1	C6	CNAG_07901	FZC29	46.505	49.256	1.05915	0.581257
1	D6	CNAG_07901	FZC29	48.795	48.141	0.986597	0.895903
3	A7	CNAG_04895	FZC3	37.973	38.787	1.02144	0.8668
3	H7	CNAG_04895	FZC3	34.98	37.053	1.05926	0.663797
3	A5	CNAG_04457	FZC30	25.883	16.628	0.642429	0.0345963
3	H4	CNAG_04457	FZC30	41.188	44.621	1.08335	0.485479
3	D12	CNAG_03741	FZC31	44.99	50.198	1.11576	0.29516
3	E12	CNAG_03741	FZC31	42.441	42.82	1.00893	0.938877
3	A6	CNAG_03768	FZC32	36.957	35.208	0.952675	0.717094
3	B4	CNAG_03768	FZC32	34.313	36.498	1.06368	0.645345
1	C9	CNAG_03561	FZC33	29.177	36.097	1.23717	0.127935
1	D9	CNAG_03561	FZC33	42.516	42.235	0.993391	0.954672
1	E2	CNAG_00896	FZC34	30.473	26.36	0.865028	0.371557
4	C4	CNAG_00896	FZC34	40.258	41.822	1.03885	0.749793
2	D2	CNAG_06339	FZC35	51.928	51.728	0.996149	0.968069
2	E2	CNAG_06339	FZC35	43.587	45.984	1.05499	0.628817
3	E3	CNAG_01948	FZC36	31.33	28.544	0.911076	0.548077
3	H5	CNAG_01948	FZC36	45.303	46.961	1.0366	0.739079
2	F1	CNAG_05642	FZC37	31.195	32.097	1.02891	0.845632
2	G1	CNAG_05642	FZC37	43.91	47.572	1.0834	0.460579
1	C7	CNAG_00830	FZC38	33.569	36.817	1.09676	0.491579
4	G5	CNAG_00830	FZC38	35.477	35.432	0.998732	0.992496
2	C7	CNAG_01977	FZC39	29.582	28.581	0.966162	0.826401
3	B7	CNAG_01977	FZC39	45.108	47.195	1.04627	0.674915
3	E9	CNAG_07922	FZC4	34.027	37.017	1.08787	0.527996
3	F9	CNAG_07922	FZC4	26.69	24.822	0.930011	0.672806
3	C12	CNAG_00841	FZC40	33.036	34.97	1.05854	0.680934
4	F5	CNAG_00841	FZC40	14.979	11.454	0.764671	0.323267
2	A2	CNAG_06871	FZC41	40.329	42.668	1.058	0.633502
2	H1	CNAG_06871	FZC41	47.555	47.977	1.00887	0.932658
1	C5	CNAG_05112	FZC42	42.339	47.4	1.11954	0.305696
1	D5	CNAG_05112	FZC42	28.447	28.99	1.01909	0.904201
1	C3	CNAG_04841	FZC43	30.293	27.328	0.902123	0.518777
3	D3	CNAG_04841	FZC43	41.155	40.57	0.985785	0.905375
4	G3	CNAG_05380	FZC44	22.109	19.584	0.885793	0.542881
2	D12	CNAG_02305	FZC45	28.145	34.356	1.22068	0.167241
2	E12	CNAG_02305	FZC45	21.59	22.75	1.05373	0.777995
2	F12	CNAG_03849	FZC45	29.521	30.066	1.01846	0.904894
2	G12	CNAG_03849	FZC45	36.767	37.783	1.02763	0.833111
1	E11	CNAG_03115	FZC46	44.352	42.967	0.968773	0.78041
1	F11	CNAG_03115	FZC46	30.519	24.728	0.810249	0.208544
2	D4	CNAG_04184	FZC47	39.076	38.578	0.987256	0.918704
2	E4	CNAG_04184	FZC47	41.394	43.242	1.04464	0.707512
3	F7	CNAG_03431	FZC48	32.67	36.829	1.1273	0.375204
3	G7	CNAG_03431	FZC48	35.626	38.103	1.06953	0.604993
2	D11	CNAG_06719	FZC49	34.478	38.524	1.11735	0.394626
2	E11	CNAG_06719	FZC49	28.791	27.004	0.937932	0.69309
4	F1	CNAG_03336	FZC50	48.791	50.29	1.03072	0.764263
4	G1	CNAG_03336	FZC50	33.7	41.219	1.22312	0.111677
2	A8	CNAG_02877	FZC51	44.699	43.93	0.982796	0.87708
2	B8	CNAG_02877	FZC51	34.835	38.129	1.09456	0.489335
2	G9	CNAG_00018	FZC6	13.93	13.968	1.00273	0.991244
2	H9	CNAG_00018	FZC6	36.734	35.926	0.978004	0.866892
3	C9	CNAG_06156	FZC7	28.399	27.497	0.968238	0.841457
3	D9	CNAG_06156	FZC7	42	46.103	1.09769	0.405799
2	E10	CNAG_04807	FZC8	21.253	25.673	1.20797	0.279952
2	F10	CNAG_04807	FZC8	24.29	26.359	1.08518	0.629472
3	E10	CNAG_03059	FZC9	34.623	31.429	0.907749	0.502006
4	G4	CNAG_03059	FZC9	32.783	36.937	1.12671	0.376201
4	H4	CNAG_03059	FZC9	35.701	39.528	1.1072	0.42443
3	C10	CNAG_00193	GAT1	18.373	19.588	1.06613	0.753719
3	D10	CNAG_00193	GAT1	21.424	22.214	1.03687	0.847315
4	A3	CNAG_01551	GAT201	33.654	53.919	1.60216	1.7976e-05
4	B3	CNAG_01551	GAT201	37.138	55.723	1.50043	0.000119845
1	A4	CNAG_03401	GAT203	42.624	45.276	1.06222	0.591774
1	B4	CNAG_03401	GAT203	41.426	43.537	1.05096	0.668252
2	D1	CNAG_06762	GAT204	50.23	62.721	1.24868	0.0124816
2	E1	CNAG_06762	GAT204	28.862	43.386	1.50322	0.0013491
3	E11	CNAG_05153	GAT5	10.027	8.526	0.850304	0.617262
3	F11	CNAG_05153	GAT5	7.805	7.317	0.937476	0.855646
4	E3	CNAG_00514	GAT6	9.954	10.095	1.01417	0.962436
2	D3	CNAG_00514	GAT6-ALSO YSB1385	61.972	61.408	0.990899	0.90751
2	E3	CNAG_00514	GAT6-ALSO YSB1385	26.507	25.636	0.967141	0.843562
3	G8	CNAG_01708	GAT7	47.127	48.958	1.03885	0.713764
3	H8	CNAG_01708	GAT7	58.069	59.663	1.02745	0.746669
1	E1	CNAG_01883	GAT8	41.017	40.249	0.981276	0.875922
1	F1	CNAG_01883	GAT8	36.97	36.508	0.987503	0.923753
4	B2	CNAG_01841	GLN3	28.862	32.935	1.14112	0.368718
4	C2	CNAG_01841	GLN3	25.633	23.35	0.910935	0.601046
1	D7	CNAG_05186	GRF1	54.411	54.309	0.998125	0.983661
1	E7	CNAG_05186	GRF1	50.914	47.506	0.933064	0.49542
3	B5	CNAG_06818	HAP1	31.283	34.965	1.1177	0.427113
3	C5	CNAG_06818	HAP1	33.858	39.499	1.16661	0.23325
1	G9	CNAG_07435	HAP2	14.109	15.572	1.10369	0.674292
1	H9	CNAG_07435	HAP2	26.281	26.914	1.02409	0.885649
2	E8	CNAG_03116	HCM1	29.149	28.07	0.962983	0.812323
2	F8	CNAG_03116	HCM1	36.985	38.245	1.03407	0.794095
3	F4	CNAG_03212	HCM101	40.053	44.442	1.10958	0.370411
3	G4	CNAG_03212	HCM101	47.382	47.695	1.00661	0.950017
2	B3	CNAG_03527	HEL2	45.579	47.343	1.0387	0.723199
2	C3	CNAG_03527	HEL2	45.046	50.486	1.12077	0.274227
1	G10	CNAG_00791	HLH1	19.036	17.095	0.898035	0.621013
1	H10	CNAG_00791	HLH1	26.569	23.924	0.900448	0.549291
4	C3	CNAG_05375	HLH2	25.946	19.724	0.760194	0.155767
1	C10	CNAG_05375	HLH2-ALSO YSB1148	35.553	33.035	0.929176	0.598863
1	D10	CNAG_05375	HLH2-ALSO YSB1148	26.635	26.116	0.980514	0.906537
3	B3	CNAG_06751	HLH3	13.708	20.371	1.48607	0.0527083
3	C3	CNAG_06751	HLH3	10.076	16.869	1.67418	0.0240249
3	B1	CNAG_07443	HLH4	40.066	43.917	1.09612	0.431946
3	C1	CNAG_07443	HLH4	33.007	31.332	0.949253	0.721689
3	G11	CNAG_02516	HLH5	33.66	36.989	1.0989	0.481134
3	H6	CNAG_02516	HLH5	42.844	48.474	1.13141	0.255241
3	D2	CNAG_01431	HOB1	6.435	6.622	1.02906	0.939252
3	E2	CNAG_01431	HOB1	8.93	7.355	0.823628	0.58075
3	F1	CNAG_01858	HOB2	38.036	43.019	1.13101	0.304695
3	G1	CNAG_01858	HOB2	46.146	50.132	1.08638	0.423955
2	A10	CNAG_05176	HOB3	26.607	24.599	0.924531	0.649541
2	B10	CNAG_05176	HOB3	40.125	38.645	0.963115	0.762692
2	B5	CNAG_06921	HOB4	58.124	58.704	1.00998	0.906415
2	C5	CNAG_06921	HOB4	43.388	46.959	1.0823	0.4712
2	C6	CNAG_02241	HOB5	34.938	36.914	1.05656	0.678543
2	D6	CNAG_02241	HOB5	48.075	47.951	0.997421	0.9802
1	C12	CNAG_05093	HOB6	38.579	35.609	0.923015	0.541776
1	D12	CNAG_05093	HOB6	29.074	23.209	0.798273	0.196511
3	A11	CNAG_04586	HOB7	47.753	48.655	1.01889	0.856695
3	B11	CNAG_04586	HOB7	26.717	17.219	0.644496	0.0318308
3	A2	CNAG_04176	HSF2	28.349	26.119	0.921338	0.620745
3	H1	CNAG_04176	HSF2	52.264	54.554	1.04382	0.646615
4	H3	CNAG_04036	HSF3	22.475	30.309	1.34857	0.0605486
3	B6	CNAG_04036	HSF3-also YSB2529	34.724	36.748	1.05829	0.670744
3	C6	CNAG_04036	HSF3-also YSB2529	29.415	37.479	1.27415	0.0767702
2	F6	CNAG_05538	JJJ1	28.235	27.882	0.987498	0.937494
2	G6	CNAG_05538	JJJ1	28.998	30.544	1.05331	0.733319
2	B12	CNAG_00460	LIV1	22.349	19.968	0.893463	0.567625
2	C12	CNAG_00460	LIV1	21.86	22.711	1.03893	0.836865
2	C10	CNAG_06283	LIV4	33.29	35.292	1.06014	0.670963
4	D5	CNAG_06283	LIV4	3.382	2.07	0.612064	0.46796
4	E5	CNAG_06283	LIV4	5.132	4.511	0.878995	0.778372
1	G2	CNAG_02774	MAL13	39.422	39.783	1.00916	0.941112
1	H2	CNAG_02774	MAL13	37.617	41.574	1.10519	0.414016
1	G6	CNAG_04637	MBF1	30.593	34.41	1.12477	0.407477
1	H6	CNAG_04637	MBF1	49.504	52.382	1.05814	0.564866
1	C2	CNAG_07464	MBS1	17.693	20.042	1.13276	0.538191
1	D2	CNAG_07464	MBS1	12.901	12.629	0.978916	0.935328
1	G3	CNAG_01438	MBS2	32.695	30.242	0.924973	0.601032
1	H3	CNAG_01438	MBS2	47.426	46.255	0.975309	0.814588
2	B1	CNAG_07924	MCM1	35.522	34.983	0.984826	0.910328
2	C1	CNAG_07924	MCM1	37.461	38.585	1.03	0.816367
1	A11	CNAG_00068	MET32	25.461	21.838	0.857704	0.405608
1	B11	CNAG_00068	MET32	24.225	20.508	0.846563	0.385637
2	A11	CNAG_06223	MIZ1	38.996	40.86	1.0478	0.702335
4	A5	CNAG_06223	MIZ1	32.848	33.246	1.01212	0.932466
1	E10	CNAG_04837	MLN1	20.182	15.568	0.77138	0.25031
1	F10	CNAG_04837	MLN1	21.132	17.034	0.806076	0.315471
3	G9	CNAG_00031	MLR1	37.065	43.671	1.17823	0.171387
3	H9	CNAG_00031	MLR1	28.07	28.191	1.00431	0.978517
3	F12	CNAG_05222	NRG1	1.168	3.665	3.13784	0.020122
3	G12	CNAG_05222	NRG1	1.308	3.342	2.55505	0.0734188
4	D3	CNAG_01173	PAN1	34.403	28.297	0.822515	0.198675
1	C11	CNAG_01173	PAN1-ALSO YSB1182	30.916	26.782	0.866283	0.371044
1	D11	CNAG_01173	PAN1-ALSO YSB1182	27.041	22.722	0.84028	0.330866
3	D4	CNAG_03894	PDR802	39.564	41.126	1.03948	0.749396
3	E4	CNAG_03894	PDR802	31.82	30.57	0.960717	0.788416
1	G11	CNAG_05170	PIP2	33.219	26.951	0.811313	0.183258
1	H11	CNAG_05170	PIP2	29.536	24.114	0.816427	0.234636
3	H12	CNAG_05049	PIP201	51.578	51.302	0.994649	0.955957
4	A1	CNAG_05049	PIP201	45.25	49.886	1.10245	0.35164
1	G8	CNAG_06425	PPR1	17.289	17.178	0.99358	0.976583
1	H8	CNAG_06425	PPR1	33.309	34.395	1.0326	0.817767
2	C9	CNAG_03902	RDS2	37.171	35.173	0.946248	0.679284
2	D9	CNAG_03902	RDS2	29.8	32.493	1.09037	0.556003
2	A3	CNAG_05431	RIM101	44.737	55.054	1.23061	0.0379933
2	H2	CNAG_05431	RIM101	40.227	53.655	1.33381	0.00617353
1	H12	CNAG_03998	RLM1	38.636	40.642	1.05192	0.680353
2	A1	CNAG_03998	RLM1	44.523	40.069	0.899962	0.37015
4	C5	CNAG_07411	RUM1	41.598	44.692	1.07438	0.530183
4	D2	CNAG_07411	RUM1	21.643	19.781	0.913968	0.651161
3	C8	CNAG_00332	SIP4	32.923	35.609	1.08158	0.567613
3	D8	CNAG_00332	SIP4	34.425	39.228	1.13952	0.312066
2	F2	CNAG_00828	SIP401	29.667	32.11	1.08235	0.592775
2	G2	CNAG_00828	SIP401	39.1	43.134	1.10317	0.408417
1	E3	CNAG_02555	SIP402	27.445	26.359	0.96043	0.80772
1	F3	CNAG_02555	SIP402	34.448	34.303	0.995791	0.975657
1	A1	CNAG_03409	SKN7	22.573	16.768	0.742834	0.16497
1	B1	CNAG_03409	SKN7	14.577	13.839	0.949372	0.83434
1	E12	CNAG_00156	SP1 (CRZ1)	42.557	49.422	1.16131	0.164994
1	F12	CNAG_00156	SP1 (CRZ1)	41.032	46.719	1.1386	0.24762
3	D5	CNAG_04804	SRE1	23.461	23.617	1.00665	0.970634
3	E5	CNAG_04804	SRE1	27.346	24.325	0.889527	0.497926
1	E8	CNAG_05785	STB4	20.287	25.011	1.23286	0.240105
1	F8	CNAG_05785	STB4	24.828	26.06	1.04962	0.77551
2	A6	CNAG_01454	STE12	41.945	41.765	0.995709	0.970902
2	H5	CNAG_01454	STE12	42.601	43.949	1.03164	0.78516
2	F3	CNAG_06814	SXI1alpha	37.298	40.655	1.09	0.487574
2	G3	CNAG_06814	SXI1alpha	34.407	36.312	1.05537	0.688421
2	D5	CNAG_05420	USV101	40.224	34.519	0.858169	0.244645
2	E5	CNAG_05420	USV101	39.955	34.425	0.861594	0.25889
1	G7	CNAG_00239	YAP1	24.457	32.347	1.32261	0.0664167
1	G12	CNAG_00239	YAP1	15.449	28.285	1.83086	0.000382943
2	F4	CNAG_04630	YAP2	21.079	17.936	0.850894	0.44095
2	G4	CNAG_04630	YAP2	38.833	38.449	0.990112	0.9372
2	E6	CNAG_07593	YAP4	35.251	34.725	0.985078	0.912331
2	H6	CNAG_07593	YAP4	43.316	45.348	1.04691	0.681747
4	A2	CNAG_03229	YOX101	32.102	31.353	0.976668	0.872542
4	H1	CNAG_03229	YOX101	32.814	38.91	1.18577	0.194183
3	G10	CNAG_02476	YRM101	31.596	32.502	1.02867	0.845485
3	H10	CNAG_02476	YRM101	24.503	34.419	1.40469	0.0211395
3	B2	CNAG_04093	YRM103	20.539	19.082	0.929062	0.718357
3	C2	CNAG_04093	YRM103	26.321	29.703	1.12849	0.442498
3	D6	CNAG_04352	ZAP103	41.735	46.68	1.11849	0.31596
3	E6	CNAG_04352	ZAP103	35.006	39.913	1.14018	0.303599
2	B11	CNAG_05392	ZAP104	40.169	37.673	0.937863	0.610655
2	C11	CNAG_05392	ZAP104	33.838	35.195	1.0401	0.774268
3	F6	CNAG_02603	ZFC1	33.359	34.943	1.04748	0.736907
3	G6	CNAG_02603	ZFC1	37.629	44.825	1.19124	0.137442
4	A4	CNAG_02603	ZFC1	32.27	37.302	1.15593	0.281774
3	C7	CNAG_01973	ZFC2	39.333	28.584	0.726718	0.0277744
3	D7	CNAG_01973	ZFC2	53.951	42.743	0.792256	0.024536
2	D10	CNAG_05940	ZFC3	30.741	32.939	1.0715	0.633822
3	C4	CNAG_05940	ZFC3	41.329	44.465	1.07588	0.524223
2	H12	CNAG_01014	ZFC4	32.308	33.749	1.0446	0.75798
3	A1	CNAG_01014	ZFC4	36.682	34.684	0.945532	0.678451
2	F11	CNAG_04518	ZFC5	22.065	22.904	1.03802	0.839665
2	G11	CNAG_04518	ZFC5	37.384	42.222	1.12941	0.317332
2	E9	CNAG_00039	ZFC6	42.834	41.47	0.968156	0.78282
2	F9	CNAG_00039	ZFC6	31.286	31.8	1.01643	0.911729
1	A2	CNAG_05010	ZFC7	44.894	46.563	1.03718	0.737207
1	B2	CNAG_05010	ZFC7	24.565	25.945	1.05618	0.74853
3	C11	CNAG_02700	ZFC8	31.325	28.925	0.923384	0.604844
3	D11	CNAG_02700	ZFC8	39.987	37.449	0.936529	0.604392
3	A10	CNAG_03366	ZNF2	39.182	45.371	1.15796	0.204859
3	B10	CNAG_03366	ZNF2	26.195	25.059	0.956633	0.796129
